# Supplementary material for: Comparison of State-Of-The-Art Neural Network Survival Models With The Pooled Cohort Equations for Cardiovascular Disease Risk Prediction
Source: Research Square preprint supplement (doi:10.21203/rs.3.rs-958135/v1), 2021-10-27
Supplement: Supplementary file 1 [file 8d37d8b571f6e3b27e6f5e98.docx]

**Supplemental Table 1.** C-statistics for PCEs, Cox PH-TWI, Deepsurv, Nnet-survival, and Cox-nnet in 10x10 cross-validation and MESA external validation.

|  |  | **PCE** | **Cox PH-TWI** | **Deepsurv** | **Nnet-survival** | **Cox-nnet** |
| --- | --- | --- | --- | --- | --- | --- |
| **White male** | 10x10 CV | 0.7349 | **0.7372** | 0.7363 | 0.7290 | 0.7334 |
| MESA | **0.7102** | 0.7004 | 0.6892 | 0.7058 | 0.6995 |
| **White female** | 10x10 CV | **0.7973** | 0.7972 | 0.7935 | 0.7814 | 0.7878 |
| MESA | 0.7227 | 0.7276 | **0.7293** | 0.7106 | 0.727 |
| **Black male** | 10x10 CV | 0.6925 | **0.6989** | 0.6847 | 0.6636 | 0.6745 |
| MESA | **0.6907** | 0.6772 | 0.682 | 0.670 | 0.6745 |
| **Black female** | 10x10 CV | 0.778 | 0.7838 | **0.7874** | 0.7810 | 0.7778 |
| MESA | 0.711 | 0.7173 | 0.7237 | **0.7243** | 0.7112 |

The highest C-statistics for each race and sex group are bolded. Abbreviations:PCE, Pooled Cohort Equation; Cox PH, Cox Proportional Hazards model; Cox PH-PWI, Cox PH model with all two-way interactions;CV, cross-validation; MESA: Multi-Ethnic Study of Atherosclerosis.
